# Supplementary material
Source: PubMed Central journal article supplement (PMC8513472)
Supplement: jvi.01246-21-s0001.pdf [file jvi.01246-21-s0001.pdf]

1 **Movie S1.** Two viroplasms move along microtubules and finally complete their fusion  
2 (video). MA-104 cells were transfected with pEGFP-N1–NSP5 for 24 h and then  
3 infected with RVA-NMTL (MOI = 1). They were then incubated with 1  $\mu$ M SiR-  
4 tubulin and 10  $\mu$ M verapamil from 7 hpi to stain the microtubules (red). Inclusion  
5 bodies (green dots) are viroplasms. Snapshots taken with Airyscan microscopy at 9 hpi,  
6 at intervals of 40 s, show two viroplasms moving along microtubules and finally  
7 completing their fusion. Scale bars = 5  $\mu$ m.
